# Supplementary material for: Spatial transformation of multi-omics data unlocks novel insights into cancer biology
Source: eLife. 2023 Sep 5;12:RP87133. doi: 10.7554/eLife.87133 (PMC10479962; doi:10.7554/eLife.87133)
Supplement: Supplementary file 1. [file elife-87133-supp1.xlsx]

## Sheet: Sheet1
	Gene	Cancer	DataSource	Attribution
1	TP53	UCEC	Mutation	0.382868
2	PTEN	UCEC	Mutation	0.131855
3	PIK3CA	UCEC	Mutation	0.127916
4	NBPF9	UCEC	Methylation	0.0975767
5	FGF11	UCEC	Methylation	0.09646
6	POTEI	UCEC	Methylation	0.0906236
7	MEP1A	UCEC	Methylation	0.083046
8	PRKACB	UCEC	Methylation	0.0800969
9	RNASE9	UCEC	Methylation	0.0784264
10	ARID1A	UCEC	Mutation	0.0758821
11	TOP3A	UCEC	Methylation	0.0754934
12	RPS16	UCEC	Methylation	0.0746526
13	FAM153C	UCEC	Methylation	0.073592
14	USP35	UCEC	Methylation	0.0729064
15	CYB561A3	UCEC	Methylation	0.0725788
16	FKBP15	UCEC	Methylation	0.0701014
17	FTH1P18	UCEC	Methylation	0.0698207
18	NUFIP1	UCEC	Methylation	0.0696192
19	LRRC39	UCEC	Methylation	0.0694975
20	CD180	UCEC	Methylation	0.0694846
21	RPL26L1	UCEC	Methylation	0.0690783
22	NDOR1	UCEC	Methylation	0.0683963
23	SNORA20	UCEC	Methylation	0.0680073
24	GID4	UCEC	Methylation	0.0679755
25	DPY19L2P3	UCEC	Methylation	0.0672605
26	AGPAT4-IT1	UCEC	Methylation	0.0665016
27	MYO15A	UCEC	Methylation	0.06635
28	OR2B2	UCEC	Methylation	0.0662824
29	CD200R1	UCEC	Methylation	0.0661526
30	CTDNEP1	UCEC	Methylation	0.0659381
31	HEXIM2	UCEC	Methylation	0.0653583
32	IL17RB	UCEC	Methylation	0.0644056
33	SUPT7L	UCEC	Methylation	0.0639668
34	ITIH4	UCEC	Methylation	0.0638668
35	MYH3	UCEC	Methylation	0.0633554
36	UBN1	UCEC	Methylation	0.0633475
37	PPP1R17	UCEC	Methylation	0.0625389
38	TDRD6	UCEC	Methylation	0.0624211
39	MIR3671	UCEC	Methylation	0.0621278
40	MIR590	UCEC	Methylation	0.0616363
41	TP53	COAD	Mutation	0.425126
42	NBPF9	COAD	Methylation	0.136496
43	FGF11	COAD	Methylation	0.118545
44	APC	COAD	Mutation	0.112689
45	RBMX	COAD	Expression	0.102455
46	FAM84B	COAD	Methylation	0.10178
47	PIK3CA	COAD	Mutation	0.0970841
48	F12	COAD	Expression	0.0969105
49	FAM153C	COAD	Methylation	0.0932118
50	FABP1	COAD	Expression	0.0931376
51	RPL26L1	COAD	Methylation	0.0930562
52	SNORD111B	COAD	Methylation	0.0928751
53	POTEI	COAD	Methylation	0.0928036
54	MRRF	COAD	Expression	0.0907594
55	CHP2	COAD	Methylation	0.0903843
56	WIPI2	COAD	Expression	0.0903452
57	RPS16	COAD	Methylation	0.0878637
58	PRKACB	COAD	Methylation	0.0876232
59	EIF3B	COAD	Expression	0.0870208
60	YWHAZ	COAD	Expression	0.0861829
61	JUP	COAD	Expression	0.0860971
62	NMD3	COAD	Expression	0.0850294
63	TMC3	COAD	Methylation	0.0849336
64	SKP1	COAD	Methylation	0.084835
65	CYB561A3	COAD	Methylation	0.0846109
66	UBE2U	COAD	Methylation	0.0846043
67	POSTN	COAD	Expression	0.0841052
68	SMIM15	COAD	Expression	0.0838989
69	RPS10	COAD	Expression	0.08263
70	OR4K15	COAD	Methylation	0.0823983
71	WTAP	COAD	Expression	0.0816709
72	PLA2G5	COAD	Methylation	0.0812681
73	GRK6	COAD	Expression	0.0811498
74	COL7A1	COAD	Expression	0.0808556
75	TAOK1	COAD	Expression	0.0805868
76	SLC3A1	COAD	Expression	0.0804545
77	IL17RE	COAD	Expression	0.0803719
78	FTH1P18	COAD	Methylation	0.0802545
79	GID4	COAD	Methylation	0.0800366
80	MIR4786	COAD	Methylation	0.0798251
81	TP53	BLCA	Mutation	0.283025
82	NBPF9	BLCA	Methylation	0.125387
83	RBMX	BLCA	Expression	0.08936
84	COL7A1	BLCA	Expression	0.0857388
85	RPL26L1	BLCA	Methylation	0.0847479
86	KRT17	BLCA	Expression	0.0834757
87	FAM84B	BLCA	Methylation	0.0820566
88	JUP	BLCA	Expression	0.0813937
89	WIPI2	BLCA	Expression	0.0809695
90	PRKACB	BLCA	Methylation	0.0799907
91	TOP3A	BLCA	Methylation	0.0786342
92	EIF3B	BLCA	Expression	0.078115
93	RPS16	BLCA	Methylation	0.0780965
94	WTAP	BLCA	Expression	0.0772607
95	SKP1	BLCA	Methylation	0.0755058
96	POTEI	BLCA	Methylation	0.0752254
97	MRRF	BLCA	Expression	0.075004
98	SNORD111B	BLCA	Methylation	0.0749299
99	FAM153C	BLCA	Methylation	0.0744861
100	F12	BLCA	Expression	0.0740914
101	CYB561A3	BLCA	Methylation	0.0730468
102	ITIH4	BLCA	Methylation	0.072074
103	GPAA1	BLCA	Expression	0.071525
104	NMD3	BLCA	Expression	0.0714585
105	FTH1P18	BLCA	Methylation	0.0714556
106	ANKS3	BLCA	Methylation	0.0713783
107	GRK6	BLCA	Expression	0.0713258
108	CHP2	BLCA	Methylation	0.0711582
109	TRAPPC5	BLCA	Expression	0.0709424
110	SMIM15	BLCA	Expression	0.0705174
111	YWHAZ	BLCA	Expression	0.0704917
112	ACP2	BLCA	Expression	0.0699935
113	TRPT1	BLCA	Expression	0.069683
114	RPS10	BLCA	Expression	0.0696085
115	RAF1	BLCA	Expression	0.068844
116	MIR590	BLCA	Methylation	0.0686026
117	LOC105372330	BLCA	Loss	0.0685957
118	MIR4786	BLCA	Methylation	0.0682851
119	GNPTG	BLCA	Expression	0.0679512
120	FLVCR1	BLCA	Expression	0.066616
121	SLC3A1	KIRC	Expression	0.252675
122	VHL	KIRC	Mutation	0.186871
123	NBPF9	KIRC	Methylation	0.174982
124	RBMX	KIRC	Expression	0.160915
125	YWHAZ	KIRC	Expression	0.158619
126	RPS10	KIRC	Expression	0.156298
127	PLVAP	KIRC	Expression	0.153508
128	WTAP	KIRC	Expression	0.153354
129	MCAM	KIRC	Expression	0.15157
130	EPAS1	KIRC	Expression	0.148693
131	G6PC	KIRC	Expression	0.14639
132	JUP	KIRC	Expression	0.146281
133	MRRF	KIRC	Expression	0.145489
134	CTSF	KIRC	Expression	0.144867
135	WIPI2	KIRC	Expression	0.140898
136	EIF3B	KIRC	Expression	0.140648
137	HDAC5	KIRC	Expression	0.140002
138	ACP2	KIRC	Expression	0.139823
139	POSTN	KIRC	Expression	0.139083
140	MEP1A	KIRC	Methylation	0.139014
141	HEG1	KIRC	Expression	0.1371
142	TRAPPC5	KIRC	Expression	0.137033
143	SIRPD	KIRC	Methylation	0.137013
144	TRPT1	KIRC	Expression	0.136939
145	SLC22A11	KIRC	Expression	0.135873
146	GPAA1	KIRC	Expression	0.135689
147	TMED4	KIRC	Expression	0.133704
148	TAOK1	KIRC	Expression	0.133657
149	TCN2	KIRC	Expression	0.133519
150	OGG1	KIRC	Expression	0.133284
151	JAG1	KIRC	Expression	0.132995
152	SMIM15	KIRC	Expression	0.132676
153	RPS16	KIRC	Methylation	0.132208
154	NMD3	KIRC	Expression	0.131825
155	OR4K15	KIRC	Methylation	0.130816
156	EIF4ENIF1	KIRC	Expression	0.129095
157	ACTR3	KIRC	Expression	0.128838
158	F12	KIRC	Expression	0.128723
159	SNORD111B	KIRC	Methylation	0.128651
160	HIF1A	KIRC	Expression	0.128606
161	TP53	STAD	Mutation	0.349145
162	NBPF9	STAD	Methylation	0.141701
163	RBMX	STAD	Expression	0.106367
164	FAM84B	STAD	Methylation	0.0967168
165	JUP	STAD	Expression	0.0963193
166	RPL26L1	STAD	Methylation	0.0949398
167	FGF11	STAD	Methylation	0.0939075
168	WIPI2	STAD	Expression	0.093735
169	F12	STAD	Expression	0.0935574
170	WTAP	STAD	Expression	0.0929403
171	FAM153C	STAD	Methylation	0.0927101
172	POTEI	STAD	Methylation	0.0926633
173	YWHAZ	STAD	Expression	0.0916919
174	MRRF	STAD	Expression	0.091629
175	SNORD111B	STAD	Methylation	0.0908819
176	RPS16	STAD	Methylation	0.090691
177	PRKACB	STAD	Methylation	0.0903152
178	EIF3B	STAD	Expression	0.0894964
179	POSTN	STAD	Expression	0.0894865
180	BPIFB1	STAD	Expression	0.0893842
181	GRK6	STAD	Expression	0.0890152
182	OR4K15	STAD	Methylation	0.0890119
183	FLVCR1	STAD	Expression	0.087498
184	TAOK1	STAD	Expression	0.0862769
185	SMIM15	STAD	Expression	0.0862338
186	TOP3A	STAD	Methylation	0.0859929
187	NMD3	STAD	Expression	0.0853028
188	RPS10	STAD	Expression	0.0849207
189	IL17RE	STAD	Expression	0.0843873
190	GPAA1	STAD	Expression	0.08335
191	SKP1	STAD	Methylation	0.0831031
192	COL7A1	STAD	Expression	0.082694
193	ACP2	STAD	Expression	0.0825346
194	HIF1A	STAD	Expression	0.0823337
195	PRSS2	STAD	Expression	0.0816925
196	MIR4786	STAD	Methylation	0.0814787
197	FTH1P18	STAD	Methylation	0.0814474
198	NDOR1	STAD	Methylation	0.0812241
199	CHP2	STAD	Methylation	0.0809986
200	MIR503	STAD	Methylation	0.0809466
201	TP53	OV	Mutation	0.211414
202	KLK10	OV	Expression	0.0383816
203	RPS10	OV	Expression	0.0354552
204	KLK14	OV	Expression	0.0316351
205	NSL1	OV	Expression	0.0307064
206	TRPT1	OV	Expression	0.0292805
207	CTU1	OV	Expression	0.0276855
208	WTAP	OV	Expression	0.0271757
209	RPL18A	OV	Expression	0.0267239
210	JUP	OV	Expression	0.0264268
211	SMIM15	OV	Expression	0.0251086
212	KLK6	OV	Expression	0.0248943
213	KRT7	OV	Expression	0.0246206
214	TMED4	OV	Expression	0.0246053
215	ACTG1	OV	Expression	0.0245814
216	LRRC46	OV	Expression	0.0244269
217	PRPF4	OV	Expression	0.0239643
218	NIF3L1	OV	Expression	0.0235751
219	OGG1	OV	Expression	0.0235476
220	SCYL1	OV	Expression	0.02352
221	RBMX	OV	Expression	0.0233176
222	RPL28	OV	Expression	0.0231376
223	ATG4B	OV	Expression	0.0230976
224	MRRF	OV	Expression	0.023013
225	EPAS1	OV	Expression	0.0228279
226	FYTTD1	OV	Expression	0.0225116
227	GPAA1	OV	Expression	0.0223225
228	AMY1C	OV	Expression	0.0223101
229	DPP3	OV	Expression	0.0221958
230	EPHB6	OV	Expression	0.022167
231	THOC3	OV	Expression	0.0221314
232	CASP10	OV	Expression	0.0220743
233	TUBB4A	OV	Expression	0.0219161
234	GRK6	OV	Expression	0.0218679
235	MCAM	OV	Expression	0.0218195
236	RPL29	OV	Expression	0.0217652
237	KDM3A	OV	Expression	0.021713
238	C3	OV	Expression	0.0215305
239	ZBTB22	OV	Expression	0.0214425
240	KRT17	OV	Expression	0.0214289
