# Supplementary material for: Spatial transformation of multi-omics data unlocks novel insights into cancer biology
Source: eLife. 2023 Sep 5;12:RP87133. doi: 10.7554/eLife.87133 (PMC10479962; doi:10.7554/eLife.87133)
Supplement: Supplementary file 2. [file elife-87133-supp2.xlsx]

## Sheet: Sheet1
Predicted Var.	Gene Name	Data Source	CancerType
Age	ARID1A	Mutation	UCEC
Age	SLC13A2	Methylation	UCEC
Age	FBXW7	Mutation	UCEC
Age	RNF5P1	Methylation	UCEC
Age	SPIDR	Methylation	UCEC
Age	KNTC1	Methylation	UCEC
Age	TP53	Mutation	UCEC
Age	CSTF3	Methylation	UCEC
Age	CSMD3	Mutation	UCEC
Age	YME1L1	Methylation	UCEC
Age	APC	Mutation	COAD
Age	KRAS	Mutation	COAD
Age	TP53	Mutation	COAD
Age	GLA	Expression	COAD
Age	FBXW7	Mutation	COAD
Age	SPIDR	Methylation	COAD
Age	DENND5A	Mutation	COAD
Age	SLC13A2	Methylation	COAD
Age	LGALS4	Expression	COAD
Age	OR8D1	Methylation	COAD
Age	GLA	Expression	BLCA
Age	SPIDR	Methylation	BLCA
Age	PRKAB1	Methylation	BLCA
Age	TMEM9B	Expression	BLCA
Age	TAF13	Expression	BLCA
Age	RBMY1D	Loss	BLCA
Age	C19orf44	Methylation	BLCA
Age	CSTF3	Methylation	BLCA
Age	TP53	Mutation	BLCA
Age	POTEJ	Methylation	BLCA
Age	GLA	Expression	KIRC
Age	ITM2B	Expression	KIRC
Age	GSAP	Expression	KIRC
Age	TMEM9B	Expression	KIRC
Age	TAF13	Expression	KIRC
Age	DDRGK1	Expression	KIRC
Age	RPS8	Expression	KIRC
Age	RPL35A	Expression	KIRC
Age	PHC1	Expression	KIRC
Age	TMEM185B	Expression	KIRC
Age	GLA	Expression	STAD
Age	CSMD3	Mutation	STAD
Age	SPIDR	Methylation	STAD
Age	TP53	Mutation	STAD
Age	TAF13	Expression	STAD
Age	LGALS4	Expression	STAD
Age	ITM2B	Expression	STAD
Age	TMEM9B	Expression	STAD
Age	CSTF3	Methylation	STAD
Age	POTEJ	Methylation	STAD
Age	TP53	Mutation	OV
Age	GLA	Expression	OV
Age	RPS8	Expression	OV
Age	DDRGK1	Expression	OV
Age	ACP2	Expression	OV
Age	TMEM185B	Expression	OV
Age	SLC7A8	Expression	OV
Age	GSAP	Expression	OV
Age	ITM2B	Expression	OV
Age	TAF13	Expression	OV
Predicted Var.	Gene Name	Data Source	CancerType
CancerType	TP53	Mutation	UCEC
CancerType	SND1-IT1	Methylation	UCEC
CancerType	ZNF641	Methylation	UCEC
CancerType	CTBP1-AS2	Methylation	UCEC
CancerType	MIR4689	Methylation	UCEC
CancerType	MIR557	Methylation	UCEC
CancerType	CLUHP3	Methylation	UCEC
CancerType	NAV2-AS2	Methylation	UCEC
CancerType	TROAP	Methylation	UCEC
CancerType	LINC00930	Methylation	UCEC
CancerType	TP53	Mutation	COAD
CancerType	SND1-IT1	Methylation	COAD
CancerType	CTBP1-AS2	Methylation	COAD
CancerType	MIR4689	Methylation	COAD
CancerType	GPR143	Methylation	COAD
CancerType	CLUHP3	Methylation	COAD
CancerType	LINC00676	Methylation	COAD
CancerType	ZNF641	Methylation	COAD
CancerType	TBL1X	Expression	COAD
CancerType	CHRNA9	Methylation	COAD
CancerType	TP53	Mutation	BLCA
CancerType	SND1-IT1	Methylation	BLCA
CancerType	ZNF641	Methylation	BLCA
CancerType	MIR4689	Methylation	BLCA
CancerType	CTBP1-AS2	Methylation	BLCA
CancerType	CLUHP3	Methylation	BLCA
CancerType	MIR138-2	Methylation	BLCA
CancerType	CUZD1	Methylation	BLCA
CancerType	MIR557	Methylation	BLCA
CancerType	TBL1X	Expression	BLCA
CancerType	SND1-IT1	Methylation	KIRC
CancerType	MIR4689	Methylation	KIRC
CancerType	TBL1X	Expression	KIRC
CancerType	CTBP1-AS2	Methylation	KIRC
CancerType	CHRNA9	Methylation	KIRC
CancerType	CLUHP3	Methylation	KIRC
CancerType	MMP3	Methylation	KIRC
CancerType	LIPF	Methylation	KIRC
CancerType	TPD52L2	Expression	KIRC
CancerType	OR2D2	Methylation	KIRC
CancerType	TP53	Mutation	STAD
CancerType	SND1-IT1	Methylation	STAD
CancerType	ZNF641	Methylation	STAD
CancerType	CTBP1-AS2	Methylation	STAD
CancerType	CLUHP3	Methylation	STAD
CancerType	MIR4689	Methylation	STAD
CancerType	GPR143	Methylation	STAD
CancerType	TBL1X	Expression	STAD
CancerType	HMCN1	Mutation	STAD
CancerType	FAM197Y2	Methylation	STAD
CancerType	TP53	Mutation	OV
CancerType	CREG1	Expression	OV
CancerType	JSRP1	Expression	OV
CancerType	RPL13	Expression	OV
CancerType	MSI1	Expression	OV
CancerType	LRRN2	Expression	OV
CancerType	LYPD1	Expression	OV
CancerType	DNAJB13	Expression	OV
CancerType	SIKE1	Expression	OV
CancerType	NUDT16L1	Expression	OV
Predicted Var.	Gene Name	Data Source	CancerType
Metastatic	TP53	Mutation	UCEC
Metastatic	PTEN	Mutation	UCEC
Metastatic	PIK3CA	Mutation	UCEC
Metastatic	NBPF9	Methylation	UCEC
Metastatic	FGF11	Methylation	UCEC
Metastatic	POTEI	Methylation	UCEC
Metastatic	MEP1A	Methylation	UCEC
Metastatic	PRKACB	Methylation	UCEC
Metastatic	RNASE9	Methylation	UCEC
Metastatic	ARID1A	Mutation	UCEC
Metastatic	TP53	Mutation	COAD
Metastatic	NBPF9	Methylation	COAD
Metastatic	FGF11	Methylation	COAD
Metastatic	APC	Mutation	COAD
Metastatic	RBMX	Expression	COAD
Metastatic	FAM84B	Methylation	COAD
Metastatic	PIK3CA	Mutation	COAD
Metastatic	F12	Expression	COAD
Metastatic	FAM153C	Methylation	COAD
Metastatic	FABP1	Expression	COAD
Metastatic	TP53	Mutation	BLCA
Metastatic	NBPF9	Methylation	BLCA
Metastatic	RBMX	Expression	BLCA
Metastatic	COL7A1	Expression	BLCA
Metastatic	RPL26L1	Methylation	BLCA
Metastatic	KRT17	Expression	BLCA
Metastatic	FAM84B	Methylation	BLCA
Metastatic	JUP	Expression	BLCA
Metastatic	WIPI2	Expression	BLCA
Metastatic	PRKACB	Methylation	BLCA
Metastatic	SLC3A1	Expression	KIRC
Metastatic	VHL	Mutation	KIRC
Metastatic	NBPF9	Methylation	KIRC
Metastatic	RBMX	Expression	KIRC
Metastatic	YWHAZ	Expression	KIRC
Metastatic	RPS10	Expression	KIRC
Metastatic	PLVAP	Expression	KIRC
Metastatic	WTAP	Expression	KIRC
Metastatic	MCAM	Expression	KIRC
Metastatic	EPAS1	Expression	KIRC
Metastatic	TP53	Mutation	STAD
Metastatic	NBPF9	Methylation	STAD
Metastatic	RBMX	Expression	STAD
Metastatic	FAM84B	Methylation	STAD
Metastatic	JUP	Expression	STAD
Metastatic	RPL26L1	Methylation	STAD
Metastatic	FGF11	Methylation	STAD
Metastatic	WIPI2	Expression	STAD
Metastatic	F12	Expression	STAD
Metastatic	WTAP	Expression	STAD
Metastatic	TP53	Mutation	OV
Metastatic	KLK10	Expression	OV
Metastatic	RPS10	Expression	OV
Metastatic	KLK14	Expression	OV
Metastatic	NSL1	Expression	OV
Metastatic	TRPT1	Expression	OV
Metastatic	CTU1	Expression	OV
Metastatic	WTAP	Expression	OV
Metastatic	RPL18A	Expression	OV
Metastatic	JUP	Expression	OV
Predicted Var.	Gene Name	Data Source	CancerType
TP53	PTEN	Mutation	UCEC
TP53	PIK3CA	Mutation	UCEC
TP53	ADCY10P1	Methylation	UCEC
TP53	CXXC4	Methylation	UCEC
TP53	SNORD53	Methylation	UCEC
TP53	LRWD1	Methylation	UCEC
TP53	PIGG	Methylation	UCEC
TP53	2023-09-14	Methylation	UCEC
TP53	TAPT1	Methylation	UCEC
TP53	PGPEP1L	Methylation	UCEC
TP53	PIK3CA	Mutation	COAD
TP53	ADCY10P1	Methylation	COAD
TP53	CXXC4	Methylation	COAD
TP53	SNORD53	Methylation	COAD
TP53	LRWD1	Methylation	COAD
TP53	PIGG	Methylation	COAD
TP53	OR2C1	Methylation	COAD
TP53	ITGB2	Expression	COAD
TP53	USP15	Methylation	COAD
TP53	TAPT1	Methylation	COAD
TP53	ADCY10P1	Methylation	BLCA
TP53	LRWD1	Methylation	BLCA
TP53	SNORD53	Methylation	BLCA
TP53	LINC01425	Loss	BLCA
TP53	PIGG	Methylation	BLCA
TP53	PPM1F	Loss	BLCA
TP53	CXXC4	Methylation	BLCA
TP53	LOC107986345	Loss	BLCA
TP53	USP15	Methylation	BLCA
TP53	AURKAPS1	Methylation	BLCA
TP53	ITGB2	Expression	KIRC
TP53	FES	Expression	KIRC
TP53	TUFM	Expression	KIRC
TP53	CXXC4	Methylation	KIRC
TP53	NFU1	Expression	KIRC
TP53	ADCY10P1	Methylation	KIRC
TP53	ADI1	Expression	KIRC
TP53	NUPR1	Expression	KIRC
TP53	ZNF771	Expression	KIRC
TP53	ABCC13	Methylation	KIRC
TP53	ADCY10P1	Methylation	STAD
TP53	CXXC4	Methylation	STAD
TP53	LRWD1	Methylation	STAD
TP53	ITGB2	Expression	STAD
TP53	SNORD53	Methylation	STAD
TP53	PIGG	Methylation	STAD
TP53	PIK3CA	Mutation	STAD
TP53	ABCC13	Methylation	STAD
TP53	OR2C1	Methylation	STAD
TP53	TAPT1	Methylation	STAD
TP53	SEC61G	Expression	OV
TP53	NFU1	Expression	OV
TP53	TUFM	Expression	OV
TP53	RNF181	Expression	OV
TP53	MEIS1	Expression	OV
TP53	VOPP1	Expression	OV
TP53	BNIP2	Expression	OV
TP53	ITGB2	Expression	OV
TP53	NPRL3	Expression	OV
TP53	RPL18A	Expression	OV
Predicted Var.	Gene Name	Data Source	CancerType
wGII	TP53	Mutation	UCEC
wGII	PTEN	Mutation	UCEC
wGII	MYO15A	Methylation	UCEC
wGII	PIK3CA	Mutation	UCEC
wGII	MPHOSPH6	Methylation	UCEC
wGII	CXCR5	Methylation	UCEC
wGII	SRRM5	Methylation	UCEC
wGII	SYNGR4	Methylation	UCEC
wGII	ARID1A	Mutation	UCEC
wGII	WRAP53	Methylation	UCEC
wGII	TP53	Mutation	COAD
wGII	MYO15A	Methylation	COAD
wGII	PIK3CA	Mutation	COAD
wGII	MPHOSPH6	Methylation	COAD
wGII	RPL18	Expression	COAD
wGII	CLNS1A	Expression	COAD
wGII	SRRM5	Methylation	COAD
wGII	SYNGR4	Methylation	COAD
wGII	CXCR5	Methylation	COAD
wGII	SPDYE3	Methylation	COAD
wGII	TP53	Mutation	BLCA
wGII	MYO15A	Methylation	BLCA
wGII	RPL18	Expression	BLCA
wGII	MPHOSPH6	Methylation	BLCA
wGII	CLNS1A	Expression	BLCA
wGII	ZNF787	Methylation	BLCA
wGII	SRRM5	Methylation	BLCA
wGII	SPDYE3	Methylation	BLCA
wGII	WRAP53	Methylation	BLCA
wGII	OR4N4	Loss	BLCA
wGII	RPL18	Expression	KIRC
wGII	GLYATL1	Expression	KIRC
wGII	CLNS1A	Expression	KIRC
wGII	NAT8B	Expression	KIRC
wGII	TP53	Mutation	KIRC
wGII	B2M	Expression	KIRC
wGII	MPHOSPH6	Methylation	KIRC
wGII	TP53	Expression	KIRC
wGII	MYO15A	Methylation	KIRC
wGII	EDF1	Expression	KIRC
wGII	TP53	Mutation	STAD
wGII	MYO15A	Methylation	STAD
wGII	BCL11A	Loss	STAD
wGII	RPL18	Expression	STAD
wGII	CLNS1A	Expression	STAD
wGII	MPHOSPH6	Methylation	STAD
wGII	SRRM5	Methylation	STAD
wGII	SYNGR4	Methylation	STAD
wGII	SPDYE3	Methylation	STAD
wGII	MYO15A	Expression	STAD
wGII	TP53	Mutation	OV
wGII	RPL18	Expression	OV
wGII	MYO15A	Expression	OV
wGII	CLNS1A	Expression	OV
wGII	B2M	Expression	OV
wGII	SMG9	Expression	OV
wGII	TP53	Expression	OV
wGII	MYL6	Expression	OV
wGII	KIAA2013	Expression	OV
wGII	HADHA	Expression	OV
