# Supplementary material for: Spatial transformation of multi-omics data unlocks novel insights into cancer biology
Source: eLife. 2023 Sep 5;12:RP87133. doi: 10.7554/eLife.87133 (PMC10479962; doi:10.7554/eLife.87133)
Supplement: Supplementary file 3. [file elife-87133-supp3.xlsx]

## Sheet: Sheet1
BLCA	UCEC	STAD	OV	KIRC	COAD
TOP3A	TOP3A	F12	SMIM15	SLC3A1	F12
RBMX	POTEI	RBMX	WTAP	RBMX	RBMX
PRKACB	PRKACB	FAM153C	RPS10	YWHAZ	POTEI
KRT17	MEP1A	FGF11	KLK10	WTAP	SNORD111B
WIPI2	RNASE9	WIPI2	KLK14	PLVAP	FGF11
RPL26L1	FGF11	RPL26L1	RPL18A	RPS10	RPL26L1
NBPF9	NBPF9	NBPF9	NSL1	NBPF9	NBPF9
JUP	RPS16	JUP	JUP	MCAM	FABP1
FAM84B	FAM153C	FAM84B	CTU1	EPAS1	FAM84B
COL7A1	USP35	WTAP	TRPT1	G6PC	FAM153C
