# Supplementary material for: Spatial transformation of multi-omics data unlocks novel insights into cancer biology
Source: eLife. 2023 Sep 5;12:RP87133. doi: 10.7554/eLife.87133 (PMC10479962; doi:10.7554/eLife.87133)
Supplement: Supplementary file 4. [file elife-87133-supp4.xlsx]

## Sheet: Sheet1
	coef	exp(coef)	se(coef)	robust se	z	Pr(>|z|)	X2.5..	X97.5..	gene
gene	0.559494	1.74979	0.26822	0.258774	2.16209	0.0306109	0.052306	1.06668	RBMX
StageII	0.267806	1.30709	0.219071	0.217994	1.2285	0.219259	-0.159455	0.695067	RBMX
StageIII	0.0676826	1.07003	0.21928	0.214102	0.316123	0.751909	-0.35195	0.487315	RBMX
StageIV	0.0285329	1.02894	0.2343	0.222907	0.128004	0.898146	-0.408356	0.465422	RBMX
gendermale	-0.0432551	0.957667	0.193932	0.197579	-0.218926	0.826708	-0.430503	0.343993	RBMX
log10(Neoantigen.burden.per.MB)	-0.951877	0.386016	0.190897	0.183772	-5.17967	2.22278e-07	-1.31206	-0.591691	RBMX
Baseline.ECOG.Score	0.627276	1.8725	0.132799	0.134777	4.65417	3.25289e-06	0.363118	0.891435	RBMX
gene1	0.248065	1.28154	0.0848142	0.0777376	3.19105	0.00141756	0.0957018	0.400427	COL7A1
StageII1	0.437414	1.5487	0.228307	0.219676	1.99118	0.0464615	0.0068566	0.86797	COL7A1
StageIII1	-0.0493531	0.951845	0.222665	0.216424	-0.228039	0.819616	-0.473536	0.374829	COL7A1
StageIV1	0.0272045	1.02758	0.23508	0.220792	0.123213	0.901938	-0.405541	0.45995	COL7A1
gendermale1	-0.0382369	0.962485	0.194706	0.206966	-0.18475	0.853425	-0.443883	0.367409	COL7A1
log10(Neoantigen.burden.per.MB)1	-0.90538	0.404388	0.183271	0.179168	-5.05326	4.34332e-07	-1.25654	-0.554218	COL7A1
Baseline.ECOG.Score1	0.644167	1.9044	0.132833	0.135887	4.74045	2.13242e-06	0.377833	0.910502	COL7A1
gene2	0.18934	1.20845	0.0625134	0.0640524	2.95601	0.00311647	0.0637991	0.31488	KRT17
StageII2	0.493167	1.63749	0.233556	0.236947	2.08133	0.0374033	0.0287584	0.957575	KRT17
StageIII2	-0.00500619	0.995006	0.220503	0.209714	-0.0238715	0.980955	-0.416038	0.406026	KRT17
StageIV2	0.258958	1.29558	0.243653	0.231438	1.11891	0.263178	-0.194652	0.712568	KRT17
gendermale2	0.0138906	1.01399	0.195013	0.207607	0.0669085	0.946655	-0.393011	0.420792	KRT17
log10(Neoantigen.burden.per.MB)2	-0.909768	0.402618	0.182991	0.177755	-5.11811	3.08609e-07	-1.25816	-0.561375	KRT17
Baseline.ECOG.Score2	0.617861	1.85496	0.131472	0.135741	4.55176	5.3198e-06	0.351813	0.883908	KRT17
gene3	0.453349	1.57357	0.127666	0.141993	3.19277	0.00140916	0.175049	0.731649	JUP
StageII3	0.481878	1.61911	0.230221	0.22919	2.10253	0.0355068	0.0326749	0.931082	JUP
StageIII3	0.280004	1.32313	0.225059	0.225056	1.24415	0.213443	-0.161097	0.721105	JUP
StageIV3	0.382986	1.46666	0.249978	0.253799	1.50901	0.131296	-0.114452	0.880424	JUP
gendermale3	-0.0506889	0.950574	0.193326	0.19967	-0.253863	0.799601	-0.442035	0.340658	JUP
log10(Neoantigen.burden.per.MB)3	-1.11717	0.327206	0.199793	0.199077	-5.61172	2.00324e-08	-1.50735	-0.726982	JUP
Baseline.ECOG.Score3	0.69109	1.99589	0.135661	0.142549	4.84809	1.24657e-06	0.411699	0.970481	JUP
gene4	0.566109	1.7614	0.244712	0.230625	2.45467	0.0141013	0.114092	1.01813	WIPI2
StageII4	0.170931	1.18641	0.221595	0.218452	0.782466	0.433941	-0.257226	0.599088	WIPI2
StageIII4	0.0465492	1.04765	0.219143	0.216945	0.214567	0.830105	-0.378655	0.471753	WIPI2
StageIV4	-0.0382126	0.962508	0.236209	0.222254	-0.171932	0.863491	-0.473823	0.397398	WIPI2
gendermale4	-0.0671924	0.935015	0.193469	0.200636	-0.334897	0.737703	-0.460432	0.326047	WIPI2
log10(Neoantigen.burden.per.MB)4	-0.959054	0.383255	0.187219	0.190043	-5.04652	4.49926e-07	-1.33153	-0.586578	WIPI2
Baseline.ECOG.Score4	0.655148	1.92543	0.134659	0.140028	4.6787	2.88697e-06	0.380699	0.929597	WIPI2
gene5	0.0173713	1.01752	0.24372	0.239474	0.0725394	0.942173	-0.45199	0.486733	TOP3A
StageII5	0.232536	1.2618	0.224425	0.22677	1.02543	0.305162	-0.211925	0.676996	TOP3A
StageIII5	0.0626935	1.0647	0.220711	0.214732	0.291961	0.770316	-0.358174	0.483561	TOP3A
StageIV5	0.0246165	1.02492	0.239458	0.225128	0.109344	0.912929	-0.416626	0.465859	TOP3A
gendermale5	-0.0795521	0.92353	0.195278	0.2014	-0.394995	0.692847	-0.474289	0.315185	TOP3A
log10(Neoantigen.burden.per.MB)5	-0.834675	0.434016	0.187343	0.183821	-4.5407	5.60668e-06	-1.19496	-0.474393	TOP3A
Baseline.ECOG.Score5	0.601425	1.82472	0.134175	0.13667	4.40056	1.07972e-05	0.333557	0.869294	TOP3A
gene6	0.784575	2.19147	0.219757	0.235672	3.32909	0.000871296	0.322666	1.24648	EIF3B
StageII6	0.330414	1.39154	0.219813	0.222436	1.48544	0.137429	-0.105552	0.766381	EIF3B
StageIII6	0.0406856	1.04152	0.218623	0.213859	0.190245	0.849117	-0.37847	0.459841	EIF3B
StageIV6	-0.0111611	0.988901	0.234289	0.224362	-0.0497461	0.960325	-0.450902	0.42858	EIF3B
gendermale6	-0.0743297	0.928366	0.193164	0.195001	-0.381176	0.703073	-0.456525	0.307865	EIF3B
log10(Neoantigen.burden.per.MB)6	-1.09187	0.335589	0.197801	0.194299	-5.61952	1.91485e-08	-1.47269	-0.711049	EIF3B
Baseline.ECOG.Score6	0.702188	2.01816	0.138893	0.137686	5.09993	3.39781e-07	0.432328	0.972047	EIF3B
gene7	0.0054236	1.00544	0.21945	0.213475	0.0254062	0.979731	-0.41298	0.423827	WTAP
StageII7	0.23599	1.26616	0.218444	0.217554	1.08475	0.278034	-0.190407	0.662387	WTAP
StageIII7	0.0630446	1.06507	0.223734	0.221828	0.284205	0.776253	-0.37173	0.497819	WTAP
StageIV7	0.0273248	1.0277	0.236329	0.224113	0.121924	0.902959	-0.411928	0.466578	WTAP
gendermale7	-0.0809854	0.922207	0.194856	0.201122	-0.402669	0.687192	-0.475177	0.313206	WTAP
log10(Neoantigen.burden.per.MB)7	-0.830879	0.435666	0.179508	0.174105	-4.77229	1.82142e-06	-1.17212	-0.48964	WTAP
Baseline.ECOG.Score7	0.600018	1.82215	0.132718	0.135841	4.41706	1.00054e-05	0.333774	0.866262	WTAP
gene8	-0.0469391	0.954146	0.128628	0.110387	-0.425221	0.670675	-0.263294	0.169416	POTEI
StageII8	0.235495	1.26553	0.218008	0.216955	1.08545	0.277721	-0.18973	0.660719	POTEI
StageIII8	0.0571067	1.05877	0.220674	0.214356	0.266411	0.789923	-0.363023	0.477237	POTEI
StageIV8	0.0290734	1.0295	0.234637	0.223177	0.13027	0.896353	-0.408346	0.466493	POTEI
gendermale8	-0.0830363	0.920318	0.193125	0.198106	-0.419151	0.675106	-0.471317	0.305244	POTEI
log10(Neoantigen.burden.per.MB)8	-0.8207	0.440123	0.181354	0.175013	-4.68936	2.74067e-06	-1.16372	-0.47768	POTEI
Baseline.ECOG.Score8	0.598798	1.81993	0.131815	0.134564	4.44992	8.59034e-06	0.335058	0.862538	POTEI
gene9	0.559886	1.75047	0.227208	0.217206	2.57767	0.00994688	0.13417	0.985603	MRRF
StageII9	0.308584	1.3615	0.220415	0.216165	1.42754	0.153424	-0.115091	0.73226	MRRF
StageIII9	0.0442957	1.04529	0.219624	0.220191	0.201169	0.840566	-0.387271	0.475863	MRRF
StageIV9	0.0346793	1.03529	0.234186	0.224977	0.154146	0.877495	-0.406268	0.475626	MRRF
gendermale9	-0.0775312	0.925398	0.192543	0.194567	-0.39848	0.690277	-0.458876	0.303814	MRRF
log10(Neoantigen.burden.per.MB)9	-0.97745	0.37627	0.191429	0.185749	-5.2622	1.4234e-07	-1.34151	-0.613388	MRRF
Baseline.ECOG.Score9	0.60675	1.83446	0.13344	0.137717	4.40577	1.05406e-05	0.33683	0.876671	MRRF
