# Supplementary material for: Spatial transformation of multi-omics data unlocks novel insights into cancer biology
Source: eLife. 2023 Sep 5;12:RP87133. doi: 10.7554/eLife.87133 (PMC10479962; doi:10.7554/eLife.87133)
Supplement: Supplementary file 5. [file elife-87133-supp5.xlsx]

## Sheet: Sheet1
	coef	exp(coef)	se(coef)	robust se	z	Pr(>|z|)	X2.5..	X97.5..	gene
gene	-0.615892	0.540159	0.265767	0.229522	-2.68337	0.00728848	-1.06575	-0.166037	RBMX
GenderM	-0.0164419	0.983693	0.355652	0.359915	-0.0456827	0.963563	-0.721862	0.688978	RBMX
Age	0.0420438	1.04294	0.0152341	0.0157752	2.66518	0.0076947	0.011125	0.0729627	RBMX
Tumor_stageT1	16.2965	1.19533e+07	3037.53	0.623581	26.1338	1.50804e-150	15.0743	17.5187	RBMX
Tumor_stageTa	14.5508	2.08617e+06	3037.53	0.660491	22.0303	1.47482e-107	13.2563	15.8454	RBMX
gene1	0.0617658	1.06371	0.092174	0.10806	0.571587	0.567602	-0.150028	0.27356	COL7A1
GenderM1	0.0569922	1.05865	0.354609	0.370675	0.153752	0.877805	-0.669518	0.783502	COL7A1
Age1	0.0385186	1.03927	0.0146674	0.0151157	2.54826	0.0108263	0.00889243	0.0681448	COL7A1
Tumor_stageT11	16.2113	1.09773e+07	2969.99	0.635793	25.4978	2.08414e-143	14.9652	17.4575	COL7A1
Tumor_stageTa1	14.368	1.73764e+06	2969.99	0.672731	21.3578	3.30098e-101	13.0495	15.6866	COL7A1
gene2	-0.221136	0.801608	0.0548982	0.0591736	-3.73706	0.000186181	-0.337114	-0.105157	KRT17
GenderM2	-0.108784	0.896924	0.360157	0.354216	-0.307112	0.758758	-0.803034	0.585466	KRT17
Age2	0.0441192	1.04511	0.0153812	0.0161259	2.73592	0.00622067	0.012513	0.0757254	KRT17
Tumor_stageT12	16.3295	1.23535e+07	3389.16	0.627856	26.0083	3.99142e-149	15.0989	17.56	KRT17
Tumor_stageTa2	14.5518	2.08817e+06	3389.16	0.661979	21.9823	4.2552e-107	13.2543	15.8493	KRT17
gene3	-0.0126295	0.98745	0.178627	0.192005	-0.0657769	0.947555	-0.388952	0.363693	JUP
GenderM3	0.0388637	1.03963	0.354424	0.35703	0.108853	0.913319	-0.660903	0.73863	JUP
Age3	0.0393678	1.04015	0.0147341	0.0151607	2.59669	0.00941269	0.00965324	0.0690823	JUP
Tumor_stageT13	16.2297	1.11809e+07	2949.92	0.645719	25.1343	2.09743e-139	14.9641	17.4953	JUP
Tumor_stageTa3	14.3813	1.76092e+06	2949.92	0.672953	21.3705	2.5145e-101	13.0624	15.7003	JUP
gene4	0.29368	1.34135	0.290245	0.314888	0.932648	0.351002	-0.32349	0.91085	WIPI2
GenderM4	0.0329324	1.03348	0.353875	0.3579	0.0920156	0.926686	-0.668538	0.734403	WIPI2
Age4	0.0416975	1.04258	0.0150298	0.0163285	2.55367	0.0106595	0.00969429	0.0737007	WIPI2
Tumor_stageT14	16.3363	1.24388e+07	2993.19	0.63399	25.7675	2.05243e-146	15.0937	17.5789	WIPI2
Tumor_stageTa4	14.5133	2.00928e+06	2993.19	0.677639	21.4174	9.19349e-102	13.1851	15.8414	WIPI2
gene5	0.656931	1.92886	0.230516	0.243356	2.69947	0.00694504	0.179963	1.1339	TOP3A
GenderM5	0.0511037	1.05243	0.354359	0.361699	0.141288	0.887642	-0.657812	0.76002	TOP3A
Age5	0.042644	1.04357	0.015354	0.0159959	2.66593	0.00767754	0.0112926	0.0739954	TOP3A
Tumor_stageT15	16.5482	1.53743e+07	3076.7	0.614393	26.9342	8.73243e-160	15.344	17.7524	TOP3A
Tumor_stageTa5	14.844	2.79679e+06	3076.7	0.660469	22.4749	7.30259e-112	13.5495	16.1385	TOP3A
gene6	-0.406909	0.665705	0.271445	0.285281	-1.42635	0.153768	-0.966049	0.152231	EIF3B
GenderM6	0.0208012	1.02102	0.354376	0.363465	0.0572302	0.954362	-0.691577	0.733179	EIF3B
Age6	0.0412097	1.04207	0.0148512	0.0152044	2.71038	0.00672068	0.0114096	0.0710097	EIF3B
Tumor_stageT16	16.1471	1.02938e+07	2950.99	0.650979	24.8043	8.06251e-136	14.8712	17.4229	EIF3B
Tumor_stageTa6	14.2798	1.5909e+06	2950.99	0.688348	20.7451	1.35855e-95	12.9307	15.6289	EIF3B
gene7	-1.02549	0.358621	0.25334	0.249685	-4.10714	4.00592e-05	-1.51486	-0.536117	WTAP
GenderM7	0.0251313	1.02545	0.35498	0.376672	0.0667193	0.946805	-0.713133	0.763396	WTAP
Age7	0.0457414	1.0468	0.0152914	0.0157154	2.91062	0.00360717	0.0149399	0.076543	WTAP
Tumor_stageT17	16.3524	1.26408e+07	3490.56	0.644694	25.3647	6.19212e-142	15.0889	17.616	WTAP
Tumor_stageTa7	14.6636	2.33509e+06	3490.56	0.663463	22.1015	3.05422e-108	13.3632	15.9639	WTAP
gene8	0.0929256	1.09738	0.0475273	0.0465529	1.99613	0.0459199	0.0016836	0.184168	POTEI
GenderM8	-0.0236042	0.976672	0.355707	0.358376	-0.0658643	0.947486	-0.726008	0.6788	POTEI
Age8	0.0364122	1.03708	0.0149057	0.0155283	2.3449	0.0190321	0.00597741	0.0668471	POTEI
Tumor_stageT18	16.0729	9.55766e+06	3044.54	0.63126	25.4616	5.25716e-143	14.8356	17.3101	POTEI
Tumor_stageTa8	14.3651	1.73256e+06	3044.54	0.660819	21.7384	8.90264e-105	13.0699	15.6603	POTEI
gene9	-0.140331	0.869071	0.193323	0.171499	-0.818259	0.41321	-0.476463	0.195801	MRRF
GenderM9	0.0680697	1.07044	0.357044	0.363887	0.187063	0.851612	-0.645136	0.781275	MRRF
Age9	0.0384764	1.03923	0.0148127	0.0153885	2.50034	0.0124075	0.00831551	0.0686372	MRRF
Tumor_stageT19	16.1625	1.04538e+07	2976.02	0.628348	25.7222	6.6046e-146	14.9309	17.394	MRRF
Tumor_stageTa9	14.3089	1.63784e+06	2976.02	0.6731	21.2582	2.76959e-100	12.9896	15.6281	MRRF
